# Supplementary material
Source: PubMed Central journal article supplement (PMC4753069)
Supplement: NIHMS757321-supplement-supplement_1.pdf [file NIHMS757321-supplement-supplement_1.pdf]

Supplementary table I

| Year | Age (y.o.) | Cases | N Catalonia | N Immigrants<br>IDESCAT" | Crude Rate<br>per 100,000 |
|------|------------|-------|-------------|--------------------------|---------------------------|
| 2000 | 0-4        | 0     | 288563      | 10937                    | 0                         |
| 2000 | 5-9        | 0     | 276158      | 10058                    | 0                         |
| 2000 | 10-14      | 2     | 294514      | 11089                    | 0.679                     |
| 2000 | 15-19      | 7     | 364658      | 11541                    | 1.92                      |
| 2000 | 20-24      | 13    | 493741      | 13858                    | 2.63                      |
| 2000 | 25-29      | 27    | 527585      | 20767                    | 5.12                      |
| 2000 | 30-34      | 20    | 503594      | 26179                    | 3.97                      |
| 2000 | 35-39      | 33    | 481441      | 23127                    | 6.85                      |
| 2000 | 40-44      | 31    | 449772      | 16474                    | 6.89                      |
| 2000 | 45-49      | 30    | 408605      | 11006                    | 7.34                      |
| 2000 | 50-54      | 28    | 401538      | 6929                     | 6.97                      |
| 2000 | 55-59      | 19    | 347570      | 5172                     | 5.47                      |
| 2000 | 60-64      | 33    | 298978      | 4216                     | 11.04                     |
| 2000 | 65-69      | 28    | 325140      |                          | 8.61                      |
| 2000 | 70-74      | 18    | 283708      |                          | 6.34                      |
| 2000 | 75-79      | 27    | 224313      | 10237                    | 12.04                     |
| 2000 | 80-84      | 12    | 133289      |                          | 9                         |
| 2000 | 85+        | 9     | 110737      |                          | 8.13                      |
| 2000 | Overall    | 337   | 6213904     | 181590                   | 5.423321635               |

|      |         |     |         |        |             |
|------|---------|-----|---------|--------|-------------|
| 2001 | 0-4     | 0   | 302308  | 15193  | 0           |
| 2001 | 5-9     | 0   | 278183  | 13164  | 0           |
| 2001 | 10-14   | 0   | 291208  | 13923  | 0           |
| 2001 | 15-19   | 1   | 348875  | 15090  | 0.287       |
| 2001 | 20-24   | 13  | 481396  | 24320  | 2.7         |
| 2001 | 25-29   | 25  | 548859  | 35708  | 4.55        |
| 2001 | 30-34   | 30  | 519984  | 38989  | 5.77        |
| 2001 | 35-39   | 35  | 498405  | 32625  | 7.02        |
| 2001 | 40-44   | 42  | 463422  | 23048  | 9.06        |
| 2001 | 45-49   | 44  | 418973  | 14599  | 10.5        |
| 2001 | 50-54   | 31  | 403002  | 9062   | 7.69        |
| 2001 | 55-59   | 41  | 357241  | 5928   | 11.48       |
| 2001 | 60-64   | 27  | 296756  | 4906   | 9.1         |
| 2001 | 65-69   | 48  | 324998  |        | 14.77       |
| 2001 | 70-74   | 42  | 287398  |        | 14.61       |
| 2001 | 75-79   | 22  | 230193  | 10764  | 9.56        |
| 2001 | 80-84   | 15  | 140121  |        | 10.71       |
| 2001 | 85+     | 5   | 113758  |        | 4.4         |
| 2001 | Overall | 421 | 6305080 | 257320 | 6.677155563 |
| 2002 | 0-4     | 0   | 317389  | 22206  | 0           |
| 2002 | 5-9     | 0   | 601632  | 19410  | 0           |
| 2002 | 10-14   | 1   | 293141  | 19022  | 0.341       |
| 2002 | 15-19   | 2   | 337367  | 20833  | 0.593       |
| 2002 | 20-24   | 7   | 471260  | 40734  | 1.49        |
| 2002 | 25-29   | 12  | 574189  | 59338  | 2.09        |
| 2002 | 30-34   | 27  | 544451  | 59336  | 4.96        |
| 2002 | 35-39   | 33  | 520245  | 47783  | 6.34        |
| 2002 | 40-44   | 22  | 478207  | 32884  | 4.6         |
| 2002 | 45-49   | 32  | 431542  | 21094  | 7.42        |
| 2002 | 50-54   | 43  | 409593  | 12555  | 10.5        |
| 2002 | 55-59   | 55  | 374413  | 7681   | 14.69       |
| 2002 | 60-64   | 32  | 290386  | 6108   | 11.02       |
| 2002 | 65-69   | 34  | 324254  |        | 10.49       |
| 2002 | 70-74   | 31  | 291864  |        | 10.62       |
| 2002 | 75-79   | 32  | 234750  | 13036  | 13.63       |
| 2002 | 80-84   | 17  | 148947  |        | 11.41       |
| 2002 | 85+     | 11  | 116556  |        | 9.44        |
| 2002 | Overall | 391 | 6442797 | 382020 | 6.068792793 |
| 2003 | 0-4     | 0   | 334160  | 30313  | 0           |
| 2003 | 5-9     | 0   | 293137  | 27834  | 0           |
| 2003 | 10-14   | 0   | 296827  | 25385  | 0           |
| 2003 | 15-19   | 4   | 330187  | 27897  | 1.21        |
| 2003 | 20-24   | 6   | 457428  | 60693  | 1.31        |
| 2003 | 25-29   | 15  | 595422  | 91139  | 2.52        |
| 2003 | 30-34   | 30  | 572909  | 86206  | 5.24        |
| 2003 | 35-39   | 24  | 541299  | 66149  | 4.43        |
| 2003 | 40-44   | 30  | 492139  | 46023  | 6.1         |
| 2003 | 45-49   | 31  | 445705  | 29571  | 6.96        |
| 2003 | 50-54   | 29  | 412633  | 17339  | 7.03        |
| 2003 | 55-59   | 28  | 390753  | 10690  | 7.17        |
| 2003 | 60-64   | 25  | 299431  | 7771   | 8.35        |
| 2003 | 65-69   | 29  | 314749  |        | 9.21        |
| 2003 | 70-74   | 33  | 297460  | 15998  | 11.09       |

|      |         |     |         |        |             |
|------|---------|-----|---------|--------|-------------|
| 2003 | 75-79   | 31  | 238809  |        | 12.98       |
| 2003 | 80-84   | 14  | 158083  |        | 8.86        |
| 2003 | 85+     | 12  | 119102  |        | 10.08       |
| 2003 | Overall | 341 | 6590233 | 543008 | 5.174323882 |
| 2004 | 0-4     | 0   | 351924  | 37323  | 0           |
| 2004 | 5-9     | 0   | 303328  | 34200  | 0           |
| 2004 | 10-14   | 0   | 299467  | 31345  | 0           |
| 2004 | 15-19   | 2   | 325979  | 33961  | 0.614       |
| 2004 | 20-24   | 7   | 442059  | 69287  | 1.58        |
| 2004 | 25-29   | 15  | 605919  | 110334 | 2.48        |
| 2004 | 30-34   | 34  | 602138  | 101431 | 5.65        |
| 2004 | 35-39   | 20  | 557430  | 77180  | 3.59        |
| 2004 | 40-44   | 21  | 508275  | 54077  | 4.13        |
| 2004 | 45-49   | 36  | 461010  | 35298  | 7.81        |
| 2004 | 50-54   | 39  | 413931  | 20688  | 9.42        |
| 2004 | 55-59   | 37  | 401285  | 12471  | 9.22        |
| 2004 | 60-64   | 36  | 324837  | 8690   | 11.08       |
| 2004 | 65-69   | 30  | 295361  |        | 10.16       |
| 2004 | 70-74   | 32  | 301014  |        | 10.63       |
| 2004 | 75-79   | 37  | 242945  | 16570  | 15.23       |
| 2004 | 80-84   | 17  | 167308  |        | 10.16       |
| 2004 | 85+     | 8   | 122185  |        | 6.55        |
| 2004 | Overall | 371 | 6726395 | 642846 | 5.5155845   |
| 2005 | 0-4     | 0   | 368712  | 45552  | 0           |
| 2005 | 5-9     | 0   | 316545  | 41302  | 0           |
| 2005 | 10-14   | 1   | 302958  | 38031  | 0.33        |
| 2005 | 15-19   | 4   | 324698  | 41576  | 1.23        |
| 2005 | 20-24   | 8   | 432551  | 83446  | 1.85        |
| 2005 | 25-29   | 17  | 609856  | 137141 | 2.79        |
| 2005 | 30-34   | 33  | 632384  | 127633 | 5.22        |
| 2005 | 35-39   | 36  | 574814  | 97240  | 6.26        |
| 2005 | 40-44   | 42  | 526675  | 68441  | 7.97        |
| 2005 | 45-49   | 40  | 476809  | 44785  | 8.39        |
| 2005 | 50-54   | 38  | 421547  | 26836  | 9.01        |
| 2005 | 55-59   | 45  | 404241  | 15786  | 11.13       |
| 2005 | 60-64   | 33  | 342744  | 10846  | 9.63        |
| 2005 | 65-69   | 47  | 287631  |        | 16.34       |
| 2005 | 70-74   | 52  | 301835  |        | 17.23       |
| 2005 | 75-79   | 27  | 247860  | 20289  | 10.89       |
| 2005 | 80-84   | 23  | 175289  |        | 13.12       |
| 2005 | 85+     | 15  | 126500  |        | 11.86       |
| 2005 | Overall | 461 | 6873649 | 798904 | 6.706772487 |
| 2006 | 0-4     | 0   | 384640  | 50961  | 0           |
| 2006 | 5-9     | 1   | 332006  | 45877  | 0.301       |
| 2006 | 10-14   | 1   | 307836  | 43409  | 0.325       |
| 2006 | 15-19   | 1   | 325765  | 48012  | 0.307       |
| 2006 | 20-24   | 15  | 424568  | 91690  | 3.53        |
| 2006 | 25-29   | 19  | 606943  | 155116 | 3.13        |
| 2006 | 30-34   | 28  | 659515  | 146830 | 4.25        |
| 2006 | 35-39   | 28  | 594872  | 113660 | 4.71        |
| 2006 | 40-44   | 20  | 544601  | 79049  | 3.67        |
| 2006 | 45-49   | 35  | 491372  | 52732  | 7.12        |
| 2006 | 50-54   | 41  | 432583  | 31605  | 9.48        |

|      |         |     |         |        |             |
|------|---------|-----|---------|--------|-------------|
| 2006 | 55-59   | 39  | 406015  | 19243  | 9.61        |
| 2006 | 60-64   | 51  | 352560  | 12274  | 14.47       |
| 2006 | 65-69   | 34  | 286518  |        | 11.87       |
| 2006 | 70-74   | 49  | 302864  |        | 16.18       |
| 2006 | 75-79   | 40  | 253008  | 23299  | 15.81       |
| 2006 | 80-84   | 29  | 181519  |        | 15.98       |
| 2006 | 85+     | 12  | 133022  |        | 9.02        |
| 2006 | Overall | 443 | 7020207 | 913757 | 6.310355236 |
| 2007 | 0-4     | 0   | 399765  | 55469  | 0           |
| 2007 | 5-9     | 0   | 346704  | 48660  | 0           |
| 2007 | 10-14   | 1   | 314975  | 47359  | 0.317       |
| 2007 | 15-19   | 1   | 329992  | 51766  | 0.303       |
| 2007 | 20-24   | 7   | 419738  | 96119  | 1.67        |
| 2007 | 25-29   | 15  | 599997  | 160541 | 2.5         |
| 2007 | 30-34   | 31  | 682011  | 155901 | 4.55        |
| 2007 | 35-39   | 24  | 616205  | 121395 | 3.89        |
| 2007 | 40-44   | 35  | 563501  | 85275  | 6.21        |
| 2007 | 45-49   | 50  | 503801  | 56717  | 9.92        |
| 2007 | 50-54   | 36  | 443717  | 35383  | 8.11        |
| 2007 | 55-59   | 54  | 411200  | 20985  | 13.13       |
| 2007 | 60-64   | 57  | 368062  | 13210  | 15.49       |
| 2007 | 65-69   | 39  | 280362  |        | 13.91       |
| 2007 | 70-74   | 44  | 302475  |        | 14.55       |
| 2007 | 75-79   | 37  | 258145  | 23727  | 14.33       |
| 2007 | 80-84   | 28  | 186539  |        | 15.01       |
| 2007 | 85+     | 26  | 141165  |        | 18.42       |
| 2007 | Overall | 485 | 7168354 | 972507 | 6.765848896 |

\* rates reported per 100,000 subjects

“ information obtained from INDESCAT [www.idescat.cat/en/](http://www.idescat.cat/en/) Official statistics of Catalonia on population, economy and society.

Supplementary table 2

Continent and Country of origin from Official Residents in Catalonia 2007  
Information from: Ministerio de Trabajo y Asuntos Sociales. Observatorio  
Permanente de la Inmigración.

|                      |                |                     |                |                     |                |                      |               |
|----------------------|----------------|---------------------|----------------|---------------------|----------------|----------------------|---------------|
| <b>Total America</b> | <b>269,867</b> | <b>Total Africa</b> | <b>266,542</b> | <b>Total Europe</b> | <b>232,159</b> | <b>Total Asia</b>    | <b>91,408</b> |
| Ecuador              | <b>80,055</b>  | Morocco             | <b>211,475</b> | Romania             | <b>74,659</b>  | China                | <b>38,301</b> |
| Colombia             | <b>41,682</b>  | Gambia              | <b>15,316</b>  | Italy               | <b>32,703</b>  | Pakistan             | <b>21,786</b> |
| Peru                 | <b>33,682</b>  | Senegal             | <b>11,582</b>  | France              | <b>17,728</b>  | India                | <b>9,910</b>  |
| Argentina            | <b>22,896</b>  | Algeria             | <b>7,341</b>   | Germany             | <b>13,438</b>  | Philippines          | <b>9,498</b>  |
| Dominican Republic   | <b>19,466</b>  | Mali                | <b>3,977</b>   | Ukraine             | <b>12,966</b>  | Bangladesh           | <b>3,563</b>  |
| Bolivia              | <b>17,900</b>  | Nigeria             | <b>3,586</b>   | United Kingdom      | <b>11,746</b>  | Other in Asia        | <b>8,350</b>  |
| Uruguay              | <b>9,648</b>   | Other Africa        | <b>13,265</b>  | Poland              | <b>9,967</b>   |                      |               |
| Chile                | <b>8,600</b>   |                     |                | Bulgaria            | <b>9,758</b>   |                      |               |
| Brazil               | <b>8,259</b>   |                     |                | Portugal            | <b>9,255</b>   |                      |               |
| Cuba                 |                |                     |                | Russia              |                | <b>Total Oceania</b> | <b>319</b>    |
|                      | <b>8,076</b>   |                     |                |                     | <b>8,380</b>   |                      |               |
| Venezuela            | <b>4,966</b>   |                     |                | Holland             | <b>6,184</b>   |                      |               |
| Honduras             | <b>3,295</b>   |                     |                | Belgium             | <b>3,234</b>   |                      |               |
| Mexico               | <b>3,260</b>   |                     |                | Moldavia            | <b>2,997</b>   |                      |               |
| United States        | <b>3,014</b>   |                     |                | Other in Europe     | <b>19,144</b>  |                      |               |
| Other America        | <b>5,068</b>   |                     |                |                     |                |                      |               |
